# Supplementary material
Source: publisher site journal article supplement (https://www.dovepress.com/article/618264)
Supplement: Supplementary file 1 [file 618264_Supplementary%20material_1.pdf]

**Supplemental Table 1.** Clinicopathologic data of training cohort in univariate and multivariate regression analysis

| Variable                                                          | Univariate analysis |             |                | Multivariate analysis |             |                |
|-------------------------------------------------------------------|---------------------|-------------|----------------|-----------------------|-------------|----------------|
|                                                                   | HR                  | 95% CI      | <i>P</i> value | HR                    | 95% CI      | <i>P</i> value |
| <b>Age (year-old)</b><br>>65 (38.3%) vs. ≤65 (61.7%)              | 0.995               | 0.864~1.147 | 0.948          |                       |             |                |
| <b>Sex</b><br>Male (77.4%) vs. Female (22.6%)                     | 1.351               | 1.137~1.606 | 0.001          | 1.392                 | 1.168~1.660 | <0.001         |
| <b>Comorbidity<sup>a</sup></b><br>Yes (54.2%) vs. No (45.8%)      | 0.925               | 0.806~1.061 | 0.266          |                       |             |                |
| <b>HBV</b><br>Positive (61.4%) vs. Negative (38.6%)               | 1.116               | 0.967~1.287 | 0.134          |                       |             |                |
| <b>HCV</b><br>Positive (30.8%) vs. Negative (69.2%)               | 1.032               | 0.889~1.2   | 0.676          |                       |             |                |
| <b>Pre-OP treatment<sup>b</sup></b><br>Yes (11.1%) vs. No (88.9%) | 1.598               | 1.304~1.957 | <0.001         | 1.390                 | 1.134~1.705 | 0.002          |
| <b>ICG R15</b><br>>15(16.4%) vs. ≤15(83.6%)                       | 1.302               | 1.087~1.559 | 0.004          | 1.223                 | 1.011~1.481 | 0.039          |
| <b>ALB(g/dl)</b><br>>3.5(92.8%) vs. ≤3.5(7.2%)                    | 0.773               | 0.604~0.99  | 0.041          | 0.903                 | 0.695~1.174 | 0.447          |
| <b>AST(IU/L) 2ULN</b><br>>68(16.5%) vs. ≤68(83.5%)                | 1.522               | 1.28~1.81   | <0.001         | 1.139                 | 0.924~1.403 | 0.223          |

|                                                                     |       |             |        |       |             |        |
|---------------------------------------------------------------------|-------|-------------|--------|-------|-------------|--------|
| <b>ALT(IU/L) 2ULN</b><br>>72(16.6%) vs. ≤72(83.4%)                  | 1.459 | 1.228~1.735 | <0.001 | 1.301 | 1.059~1.598 | 0.012  |
| <b>ALP (IU/L)</b><br>>100(22.3%) vs. ≤100(77.7%)                    | 1.547 | 1.321~1.811 | <0.001 | 1.142 | 0.966~1.350 | 0.119  |
| <b>AFP (200ng/mL)</b><br>>200 (25.0%) vs. ≤200 (75.0%)              | 1.565 | 1.345~1.821 | <0.001 | 1.292 | 1.103~1.514 | 0.001  |
| <b>OP time (300 minutes)</b><br>More (37.2%) vs. less (62.8%)       | 1.318 | 1.145~1.516 | <0.001 | 0.952 | 0.811~1.117 | 0.548  |
| <b>Blood Loss (500ml)</b><br>More (25.4%) vs. less (74.6%)          | 1.452 | 1.247~1.69  | <0.001 | 1.056 | 0.895~1.246 | 0.516  |
| <b>Hepatectomy</b><br>Major (28.9%) vs. Minor (71.1%)               | 1.664 | 1.439~1.924 | <0.001 | 1.052 | 0.884~1.252 | 0.568  |
| <b>Anatomic resection</b><br>Yes (41.3%) vs. No (58.7%)             | 0.918 | 0.798~1.057 | 0.234  |       |             |        |
| <b>Inflow control</b><br>Yes (68.2%) vs. No (31.8%)                 | 1.419 | 1.214~1.659 | <0.001 | 1.148 | 0.976~1.350 | 0.095  |
| <b>Major complication<sup>c</sup></b><br>Yes (26.5%) vs. No (73.5%) | 1.427 | 1.227~1.659 | <0.001 | 1.111 | 0.950~1.299 | 0.188  |
| <b>Tumor size (cm)</b><br>>5.0(30.1%) vs. ≤5.0(69.9%)               | 2.148 | 1.863~2.477 | <0.001 | 1.566 | 1.326~1.850 | <0.001 |
| <b>Cirrhosis<sup>d</sup></b><br>Yes (47.4%) vs. no (52.6%)          | 1.236 | 1.077~1.418 | 0.003  | 1.271 | 1.100~1.469 | 0.001  |

|                                   |       |             |        |       |             |        |
|-----------------------------------|-------|-------------|--------|-------|-------------|--------|
| <b>Encapsulation</b>              |       |             |        |       |             |        |
| Yes (83.9%) vs. no (16.1%)        | 0.93  | 0.771~1.122 | 0.448  |       |             |        |
| <b>Satellite lesion (%)</b>       |       |             |        |       |             |        |
| Yes (5.5%) vs. no (94.5%)         | 3.203 | 2.5~4.105   | <0.001 | 1.953 | 1.515~2.518 | <0.001 |
| <b>Margin (cm)</b>                |       |             |        |       |             |        |
| <0.5(54.9%) vs. ≥0.5(45.1%)       | 1.308 | 1.138~1.504 | <0.001 | 1.198 | 1.039~1.380 | 0.013  |
| <b>Vascular invasion (%)</b>      |       |             |        |       |             |        |
| Yes (35.0%) vs. No (65.0%)        | 2.406 | 2.093~2.765 | <0.001 | 1.849 | 1.589~2.152 | <0.001 |
| <b>Grading I/ II/ III, IV (%)</b> |       |             |        |       |             |        |
| III, IV (38.9%) vs. I, II (61.1%) | 1.467 | 1.276~1.685 | <0.001 | 1.206 | 1.043~1.393 | 0.011  |

---

*HBV* hepatitis B virus, *HCV* hepatitis C virus, *ICG R15* indocyanine green retention test at 15 minutes, *ALB* albumin, *AST* aspartate aminotransferase, *ALT* alanine aminotransferase, *ALP* alkaline phosphatase, *AFP* alfa-fetoprotein, *Grade* Edmondson-Steiner grading system

<sup>a</sup>include diabetes mellitus, hypertension, end-stage renal disease, cerebral vascular accident, chronic obstructive pulmonary disease and other.

<sup>b</sup>include ablation, target therapy, immunotherapy, embolization, chemotherapy, radiotherapy, proton therapy, thalidomide and other.

<sup>c</sup>According to the Clavien-Dindo classification, grade 3 and above are considered major complications.

<sup>d</sup>The pathology report demonstrates an Ishak score of F5-F6.

**Supplemental Table 2.** Details of preoperative treatment received by patients in the training and validation cohort

|                                         | <b>Training cohort</b> | <b>Validation cohort</b> |
|-----------------------------------------|------------------------|--------------------------|
| RFA/PEIT                                | 37                     | 56                       |
| Tyrosine kinase inhibitors <sup>a</sup> | 0                      | 39                       |
| Immunotherapy <sup>b</sup>              | 0                      | 5                        |
| TACE/TAE                                | 144                    | 54                       |
| Chemotherapy <sup>c</sup>               | 0                      | 7                        |
| Radiotherapy                            | 1                      | 18                       |
| Proton therapy                          | 0                      | 0                        |
| Thalidomide                             | 0                      | 4                        |
| Others                                  | 4                      | 1                        |
| No/Unknow <sup>d</sup>                  | 1495                   | 151                      |

*RFA/PEIT* radiofrequency ablation or percutaneous ethanol injection therapy; *TACE/TAE* transarterial chemoembolization or transarterial embolization

<sup>a</sup>include sorafenib, regorafenib and lenvatinib

<sup>b</sup>include atezolizumab plus bevacizumab, nivolumab and pembrolizumab

<sup>c</sup>include FOLFOX and UFUR

<sup>d</sup>include portal vein embolization and clinical trial

**Supplemental Figure 1.** Comparison of long-term outcome of HCC patients after hepatectomies in training and validation cohorts.

**A.**

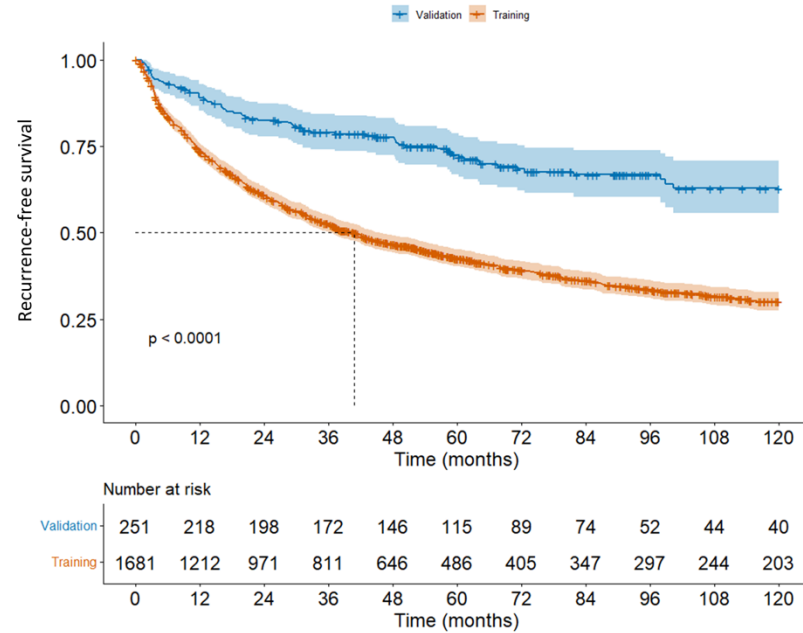

**B.**

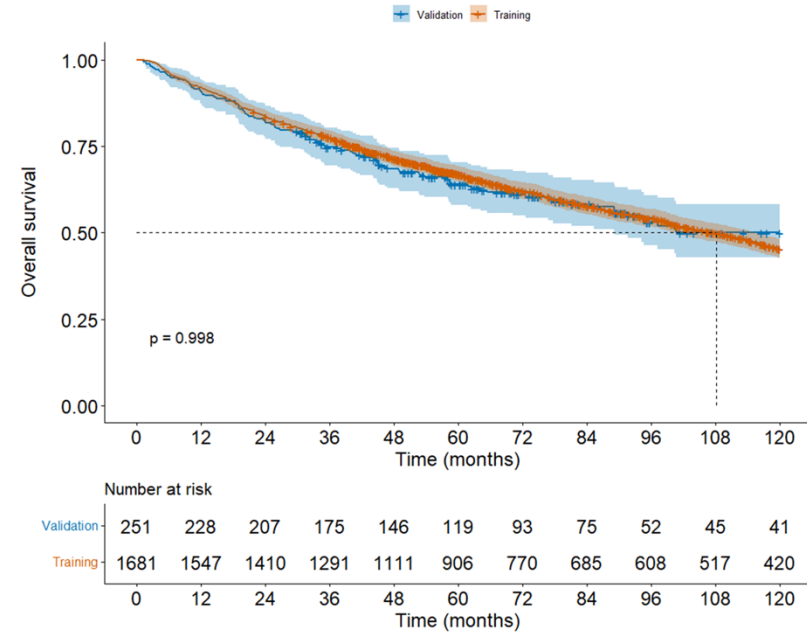

**(A) Long-term recurrence-free survival.** Patients in the validation cohort have significantly longer recurrence-free survival compared to the training cohort ( $p < 0.001$ ). As for early recurrence, 643 patients (38.3%) in the training cohort and 44 patients (17.9%) in the validation cohort experienced recurrence within two years after hepatectomies ( $p < 0.001$ ). **(B) Long-term overall survival.** There is no significantly difference in overall survival between training and validation cohort (108.3 months (IQR 100.0-116.0) vs. NA (IQR 89.3-NA);  $p = 1.00$ ).

**Supplemental Figure 2.** Programmatic hyperparameter configuration registry for the XGBoost-AFT survival analysis framework.

```
params = {  
  'verbosity': 0,  
  'objective': 'survival:aft',  
  'eval_metric': 'aft-nloglik',  
  'tree_method': 'hist',  
  'learning_rate': 0.01,  
  'aft_loss_distribution': 'normal',  
  'aft_loss_distribution_scale': 1.20,  
  'max_depth': 5,  
  'lambda': 2,  
  'alpha': 0.01,  
}
```

The screenshot illustrates the exact distribution constraints, regularization bounds, and optimization loss parameters utilized during algorithmic training to mitigate overfitting.

**Supplemental Figure 3.** Time-dependent Receiver Operating Characteristic (ROC) analysis of the final prognostic nomogram within the independent external validation cohort (n=251).

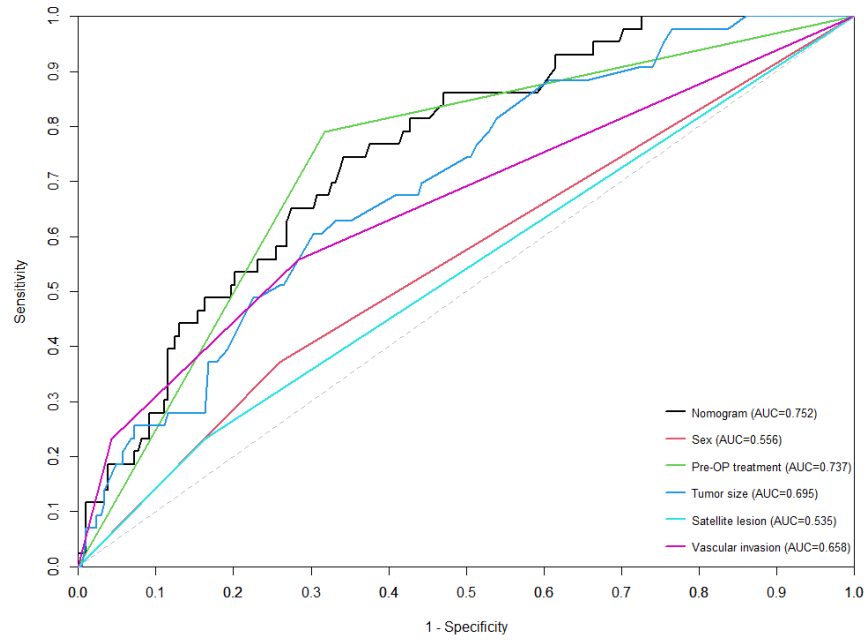

Panels illustrate the model's discriminative performance and respective Area Under the Curve (AUC) metrics for predicting early hepatocellular carcinoma recurrence at 24 months post-hepatectomy.
